# Supplementary material for: Lignin-assembled zirconium-based PNA nanofiber for the catalytic transfer hydrogenation of furfural into furfuryl alcohol
Source: Royal Society of Chemistry journal article supplement (doi:10.1039/d3se00513e), 2023-01-01
Supplement: d3se00513e1.pdf [file d3se00513e1.pdf]

## Supporting Information

### **Lignin assembled zirconium-based PNA nanofiber for catalytic transfer hydrogenation of furfural into furfuryl alcohol**

Wansi Lin, Yue Wang, Junhua Zhang\*, Huai Liu, Lincai Peng\*

Faculty of Chemical Engineering, Kunming University of Science and Technology, 727  
South Jingming Road, Chenggong District, Kunming, Yunnan, 650500, People's  
Republic of China.

**\*Corresponding Author:**

E-mail address: [zhangjh@kust.edu.cn](mailto:zhangjh@kust.edu.cn) (J. Zhang); [penglincai@kust.edu.cn](mailto:penglincai@kust.edu.cn) (L. Peng)

**Contents:**

**1. Supplementary Table**

**2. Supplementary Figures**

## 1. Supplementary Table

**Table S1.** Zirconium content of fresh and spent ZrNPs-lignin/PAN by ICP-OES.

| Entry | Catalyst               | Zirconium content, % |
|-------|------------------------|----------------------|
| 1     | Fresh ZrNPs-lignin/PAN | 17.35                |
| 2     | Spent ZrNPs-lignin/PAN | 17.08                |

## 2. Supplementary Figures

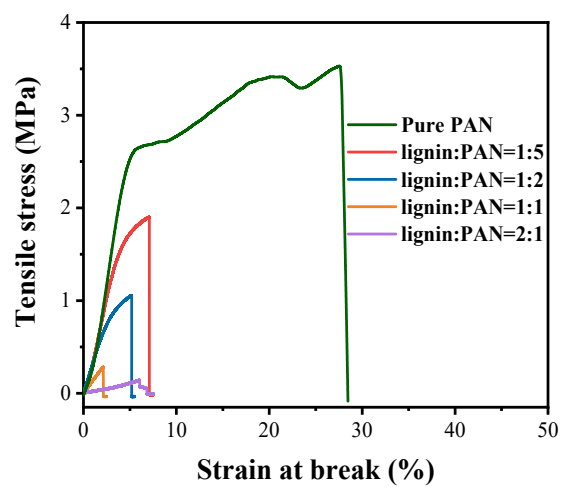

**Figure S1.** Mechanical properties of the prepared nanofibers with different ratio between lignin and PAN.

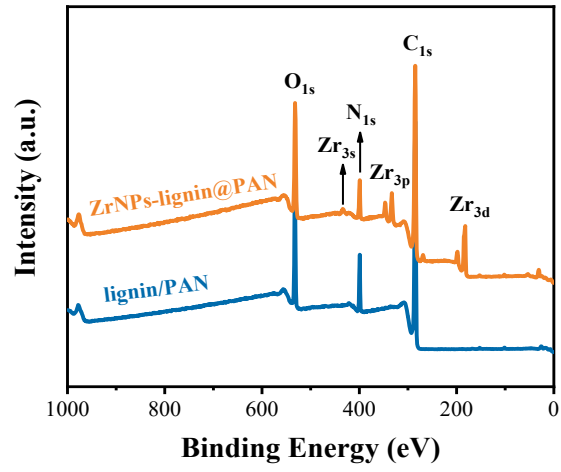

**Figure S2.** XPS survey scan of lignin/PAN and ZrNPs-lignin/PAN.

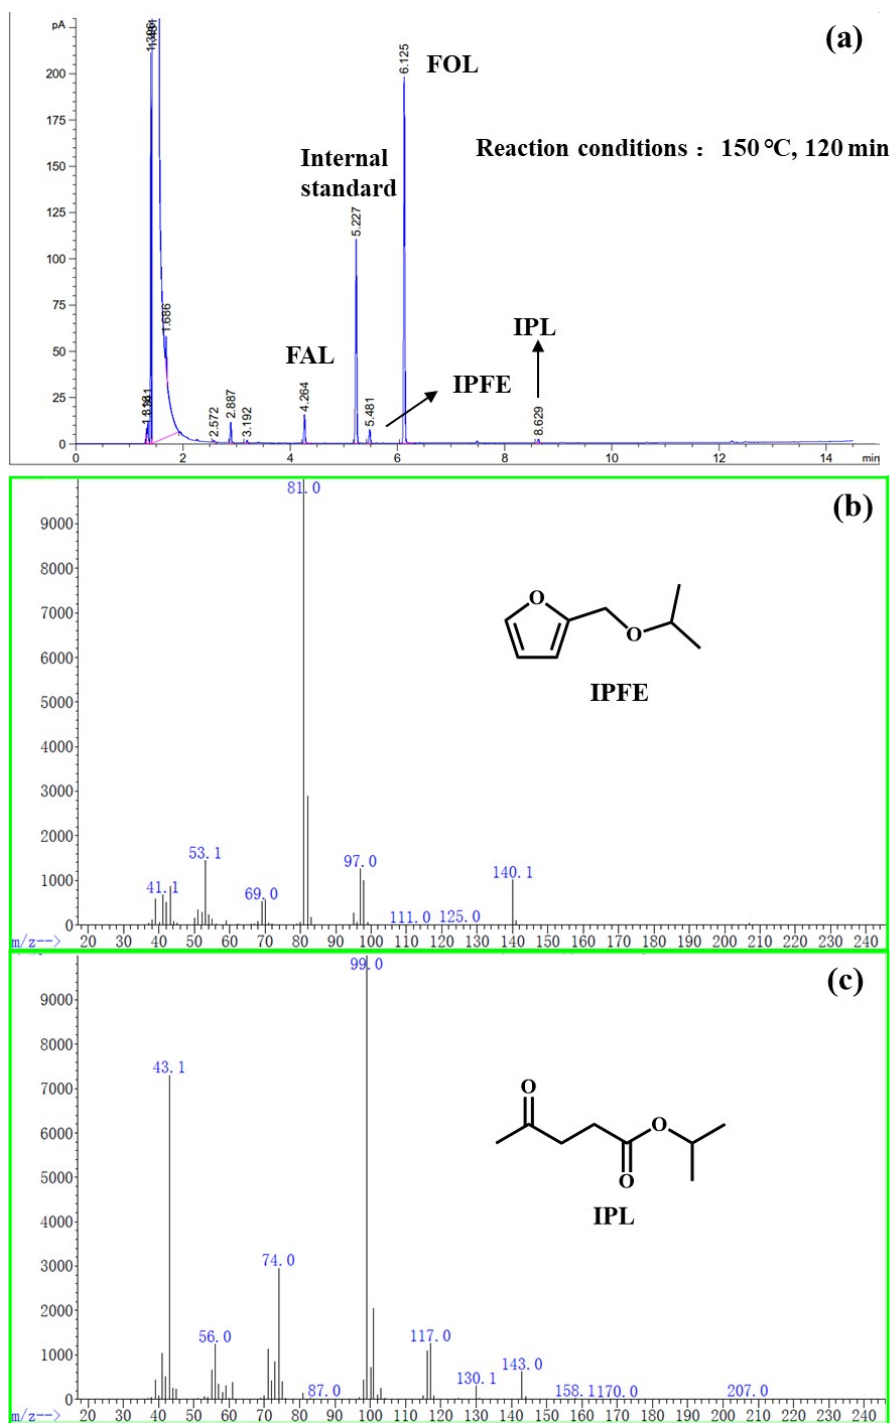

**Figure S3.** GC spectrum of IPFE and IPL (a), GC-MS spectrum of IPFE (b) and IPL

(c).

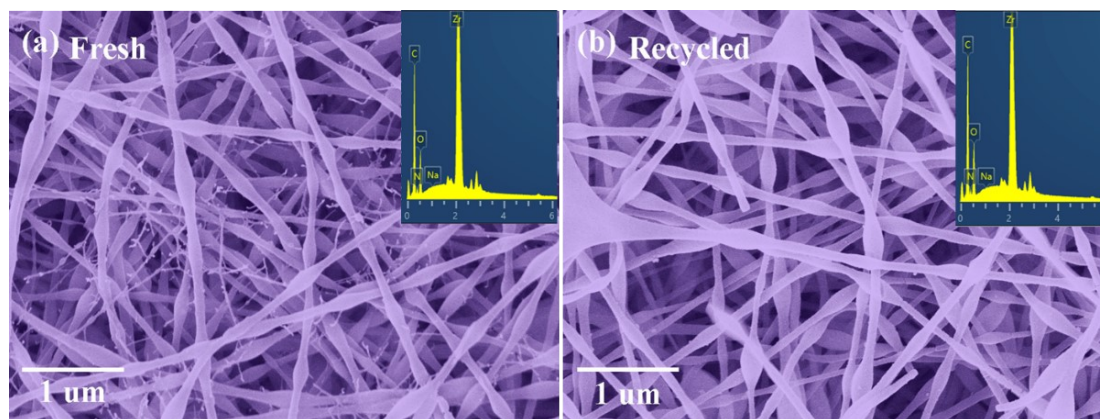

**Figure S4.** SEM-EDS of fresh (a) and recycled (b) ZrNPs-lignin/PAN.

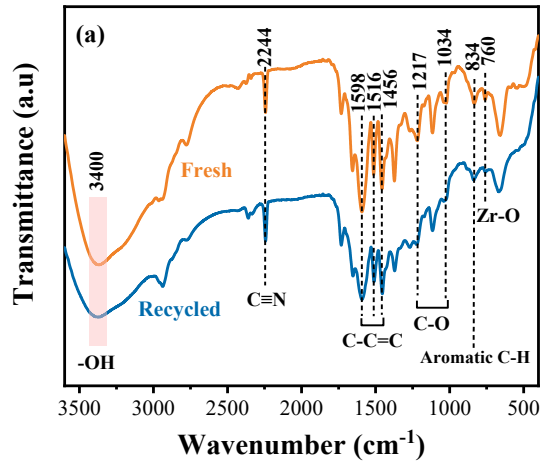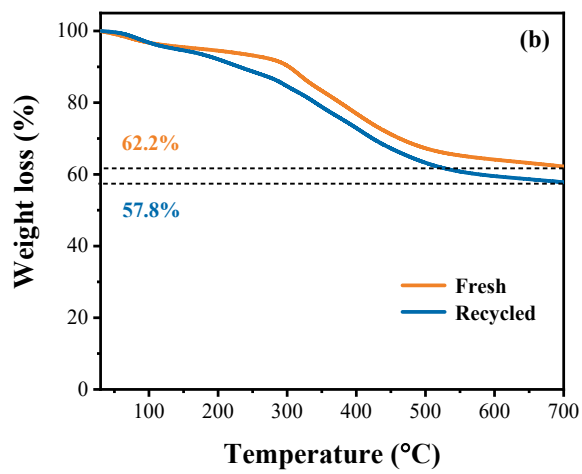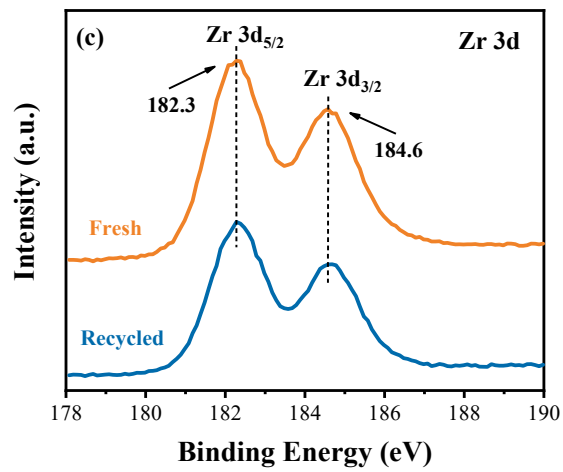

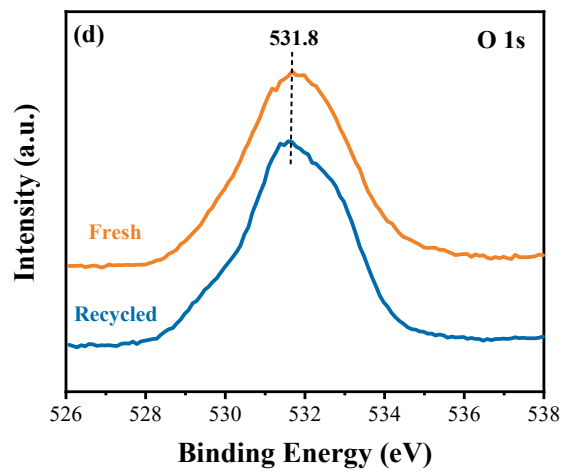

**Figure S5.** FTIR spectra (a), TG (b), Zr 3d XPS spectra (c) and O 1s XPS spectra (d) of fresh and recycled ZrNPs-lignin/PAN.
